# Supplementary material for: Superior supercapacitive performance in electrospun copper oxide nanowire electrodes
Source: Royal Society of Chemistry journal article supplement (doi:10.1039/c3ta15304e), 2014-01-01

## Supplementary Information

### Superior supercapacitive performance in electrospun copper oxide nanowire electrodes

BaijuVidhyadharan,<sup>1</sup>IzanIzwanMisonn,<sup>1</sup>RadhiyahAbd Aziz,<sup>1</sup>K. P. Padmasree,<sup>2</sup>  
Mashitah M. Yusoff,<sup>1</sup>Rajan Jose<sup>1\*</sup>

<sup>1</sup>Nanostructured Renewable Energy Materials Laboratory, Faculty of Industrial Sciences & Technology;<sup>2</sup>CINVESTAV, Unidad Saltillo, Carr. Saltillo - Monterrey km 13.5, C.P. 25900, Mexico; \*E-mail: [rjose@ump.edu.my](mailto:rjose@ump.edu.my)

S1: Theoretical specific capacitance of CuO

$$C = \frac{F}{\Delta E X m} = \frac{96485}{79.5 \times 0.68} = 1783 \text{ F/g}$$

In the above equation,  $F$  is the Faraday constant;  $\Delta E$  is the potential window and  $m$  is the molecular weight.

S2a. Bright field transmission electron micrographs of CuO nanowires

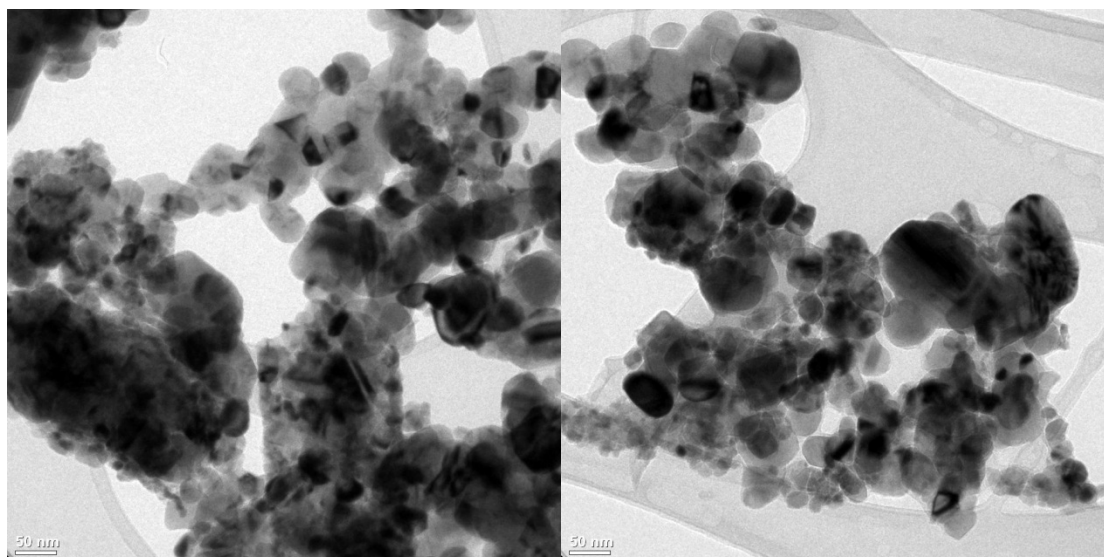

## Supplementary Information

### S2b. High resolution lattice images of CuO nanowire

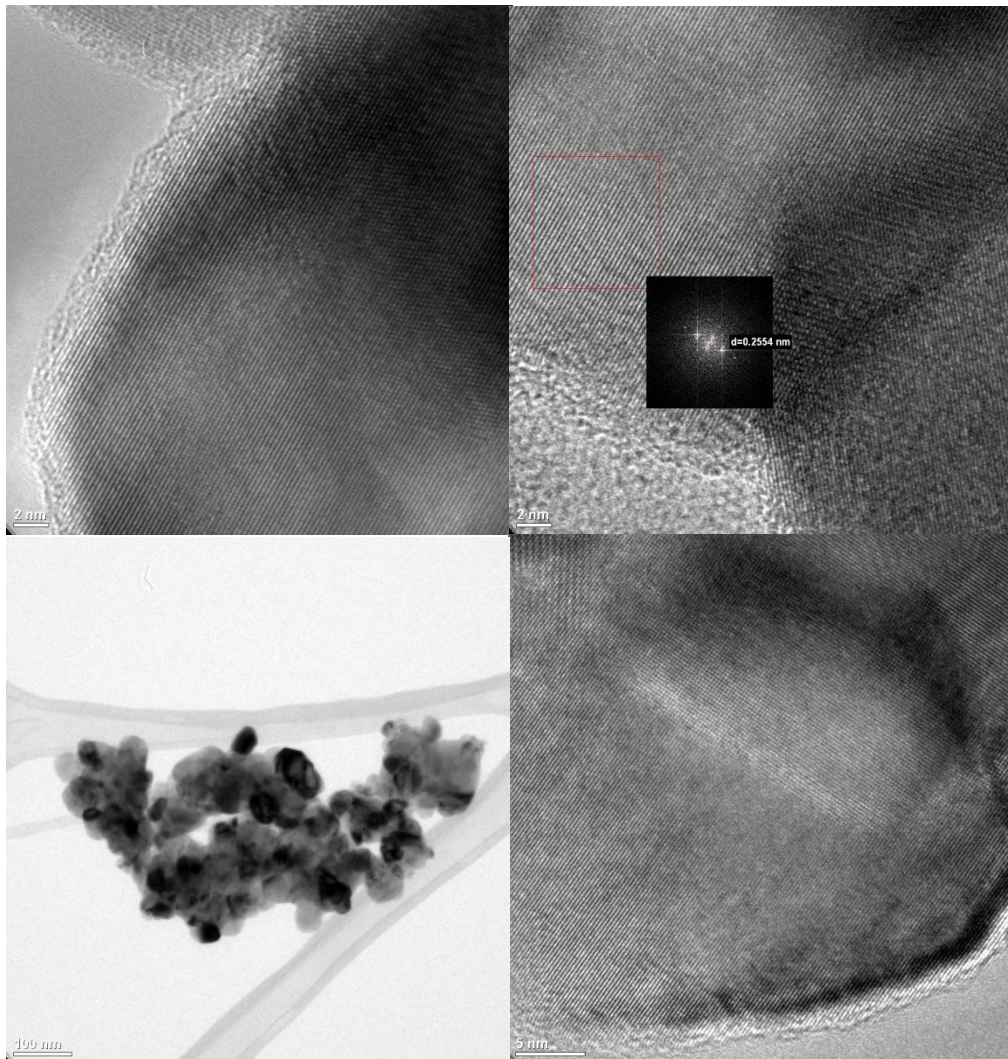

## Supplementary Information

S3. Cyclic voltammograms of the CuO nanowires electrodes at varying concentration of LiOH solution at a scan rate of 10 mV/s to optimize the electrolyte concentration for charge – discharge – cycling. The data shows that 3M LiOH would show high supercapacitive performance

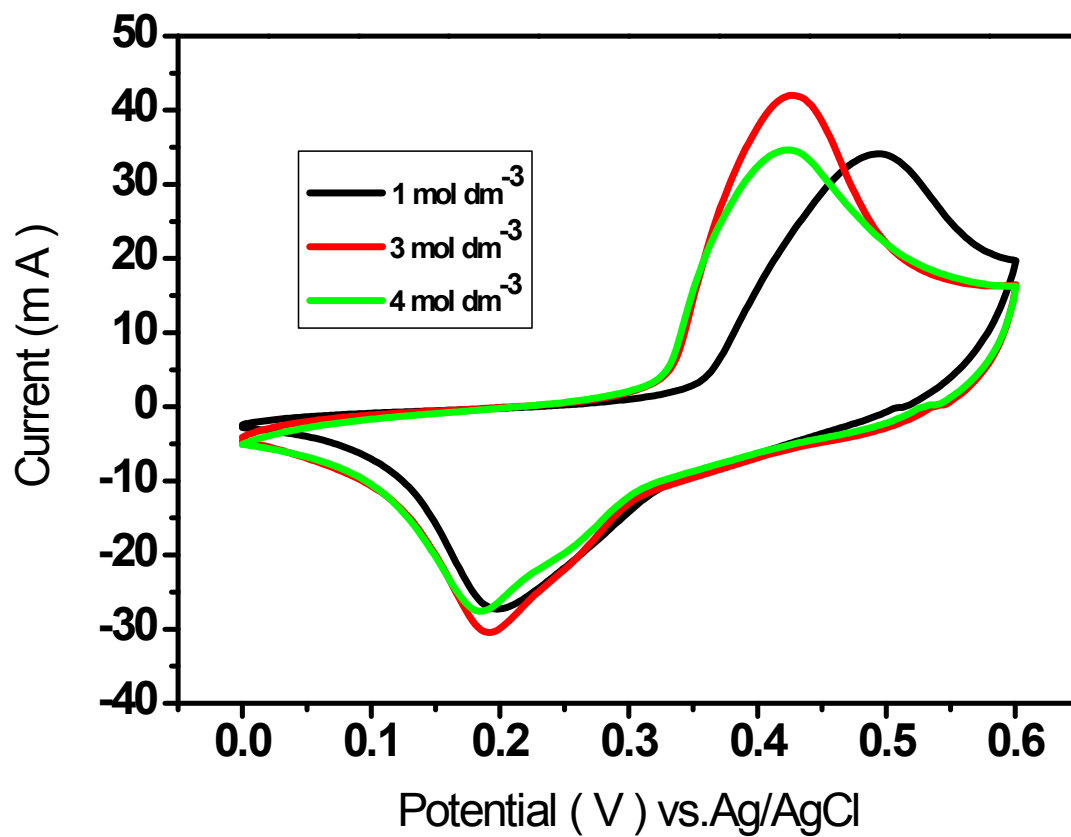

## Supplementary Information

S4. Cyclic voltammograms of CuO nanowire electrode in 3 M KOH(4b), 6 M KOH(4c) and in 3 m LiOH(4d) at scan rate 2mV/s drawn to clearly see the electrochemical events described in the Figure 4 of the main article.

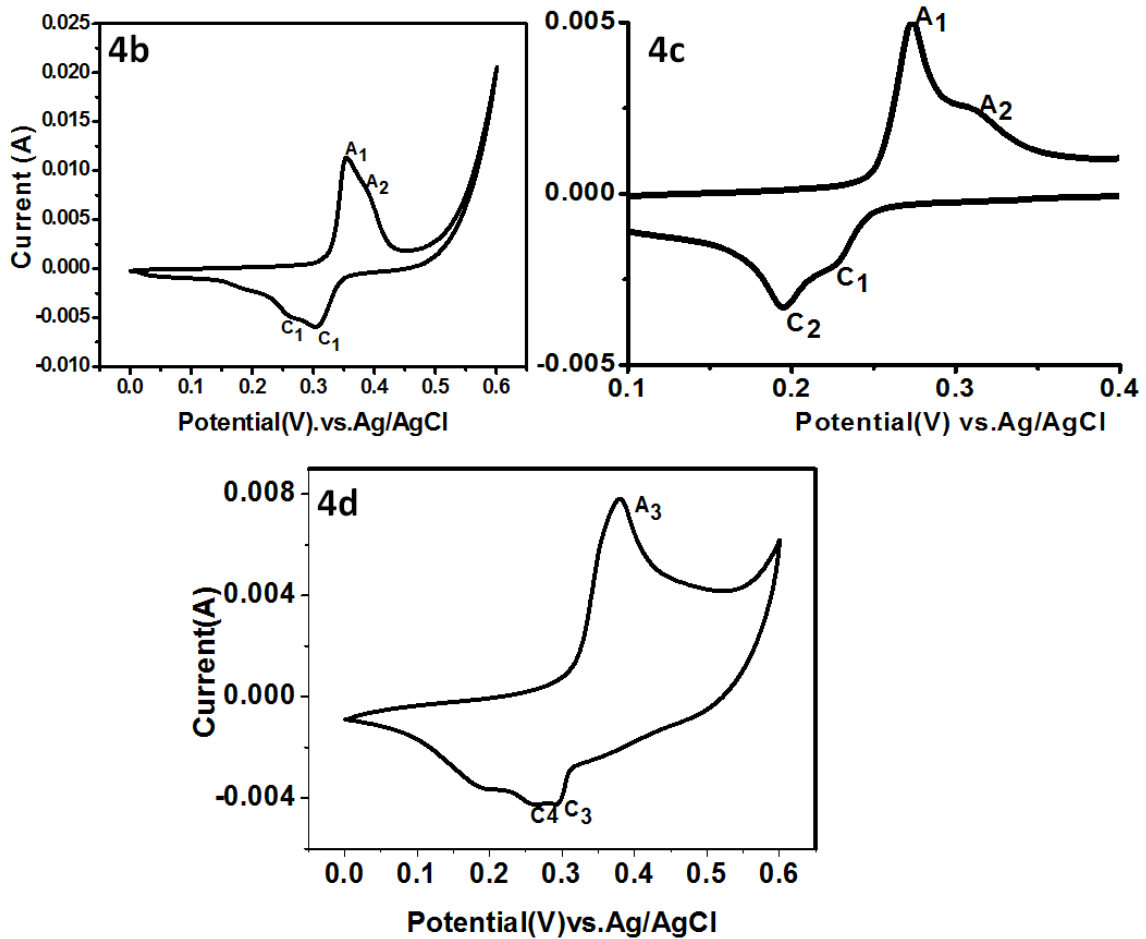

# Supplementary Information

S5. Galvanostatic Charge discharge Curves in 1M Na<sub>2</sub>SO<sub>4</sub> at a current density 10 A/g

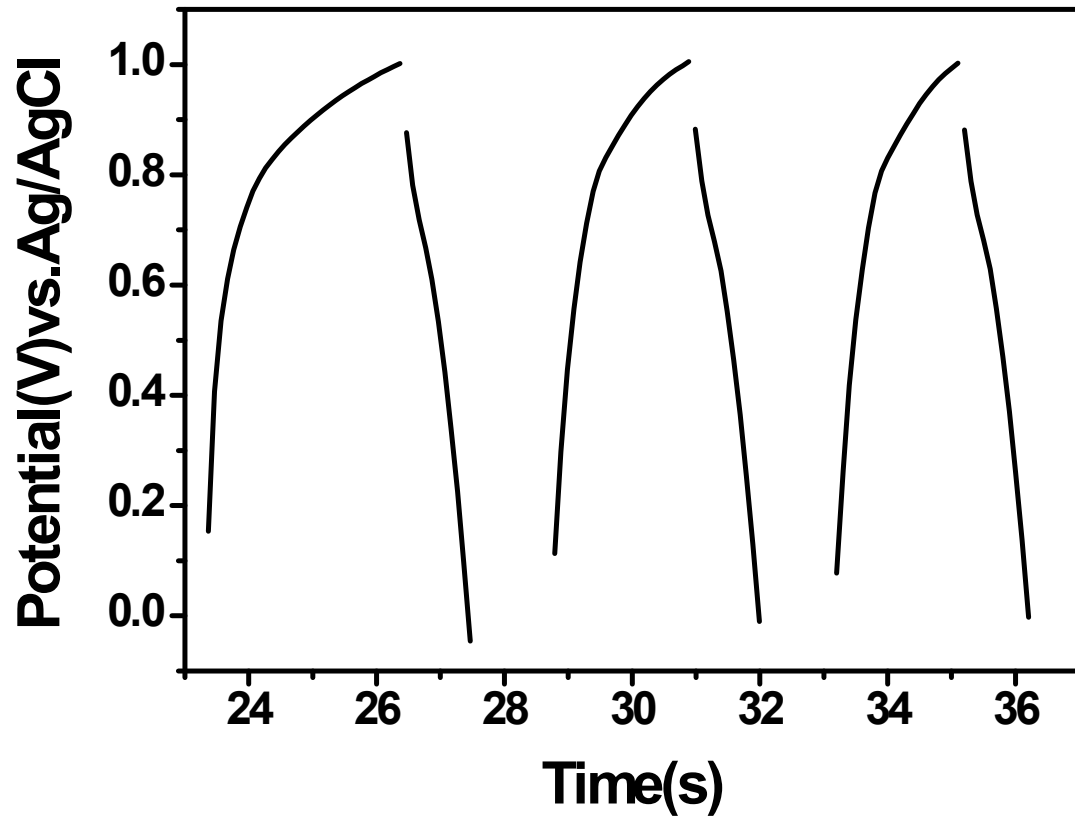

## Supplementary Information

S6. Cyclic Voltammetry of the Ni foam substrate in 6M KOH aqueous electrolyte at a scan rate  $5\text{mVs}^{-1}$ . Oxidation of the nickel foam is negligibly small.

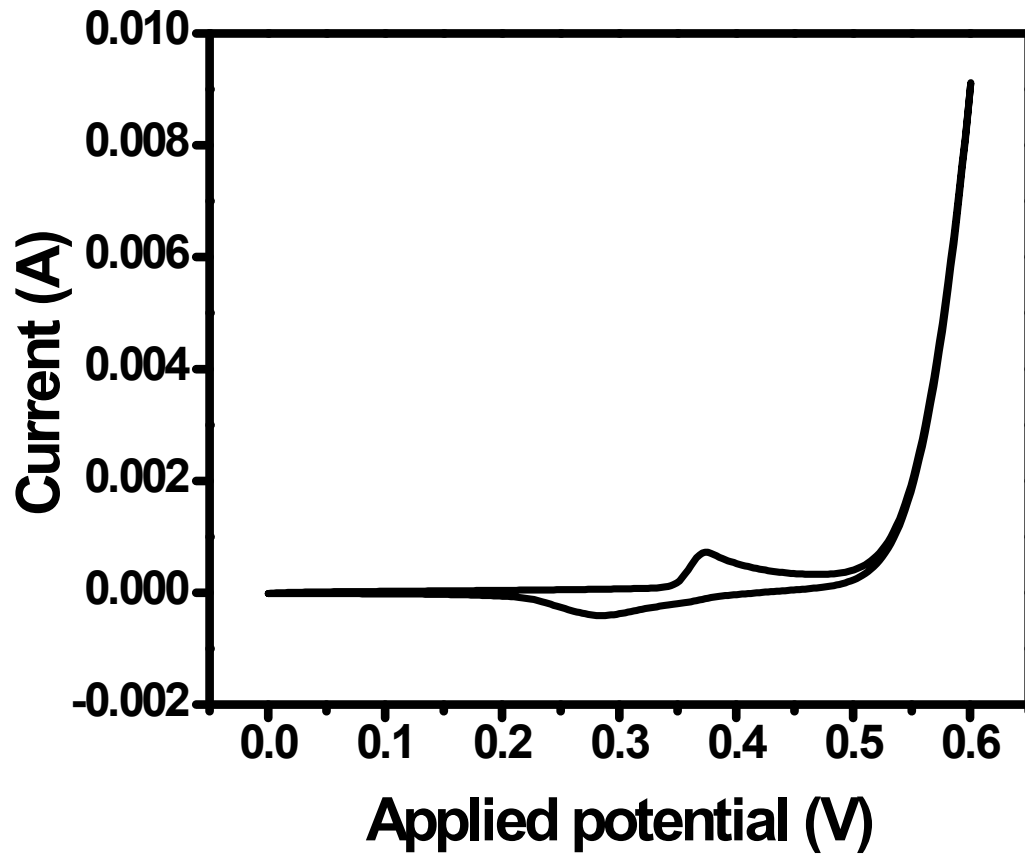

## Supplementary Information

S7. Discharge curve of the Ni foam substrate in 6 M KOH indicating that the discharge time is much lower (5 s) compared with that including the CuO nanowires (127 s). Area of the substrate was  $\sim 1 \text{ cm}^2$  similar to that of the CuO nanowire electrode

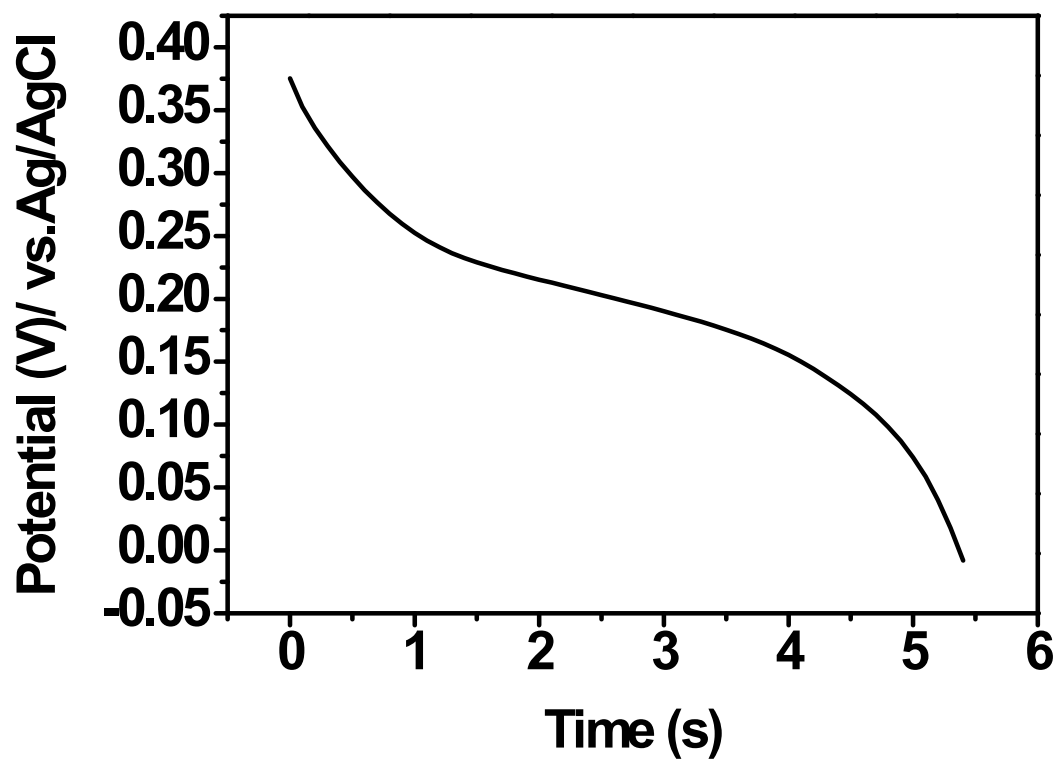

## Supplementary Information

S8: Panels a, b, and c shows the cycling stability and Coulombic efficiency in the respective electrolytes. Panel “d” shows the variation in the internal resistance of the CuO electrode in various electrolytes noted in the figure labels.

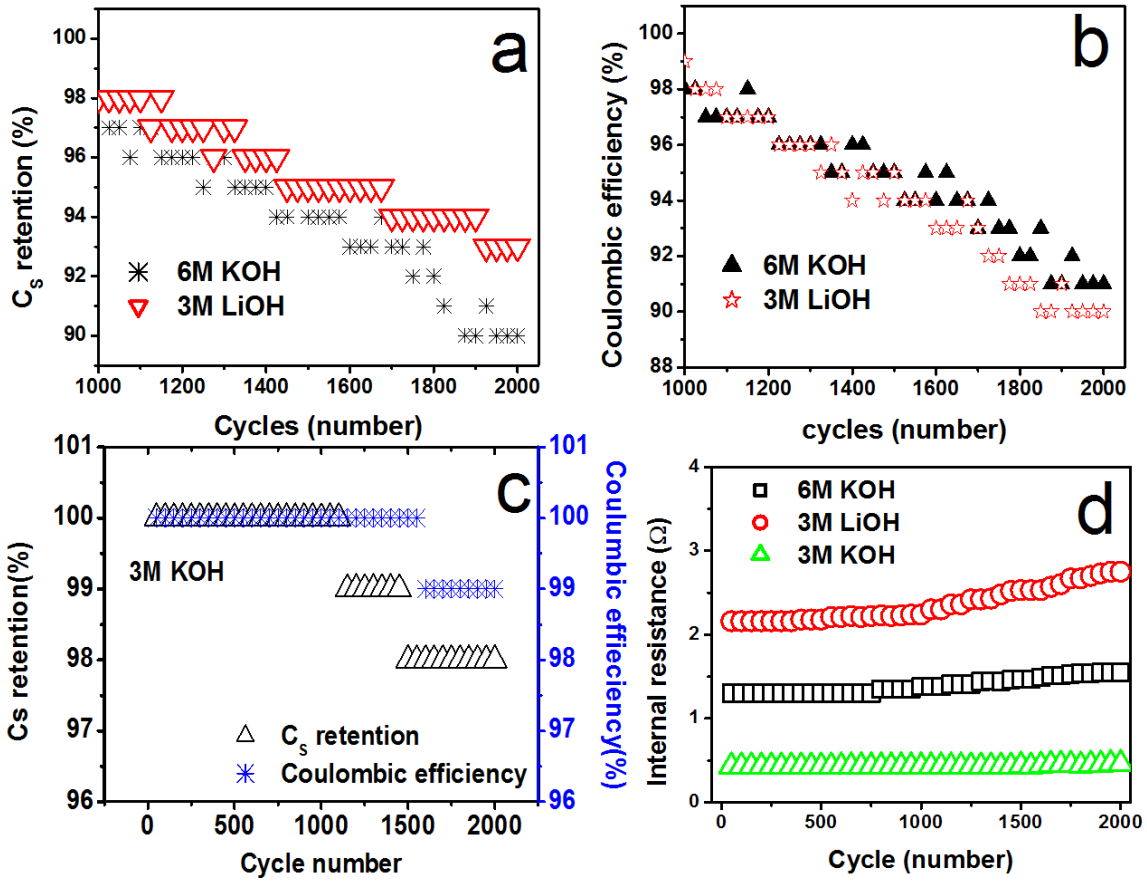

Supplement: c3ta15304e1.pdf [file c3ta15304e1.pdf]
